# Supplementary material
Source: publisher site journal article supplement (https://www.spandidos-publications.com/4924/downloadSupplementary)

Figure S1. Association between BUN/Cr and in-hospital mortality. BUN, blood urea nitrogen; Cr, creatinine.

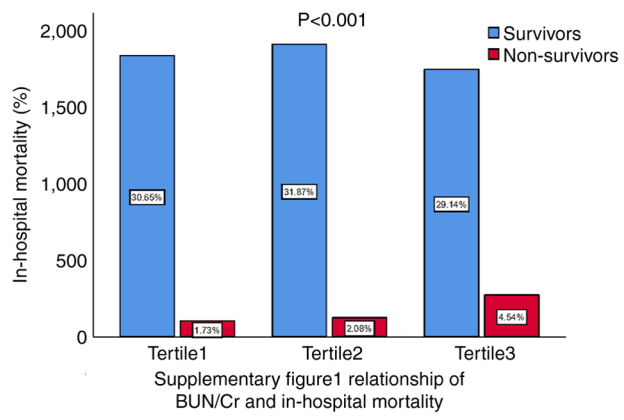

Figure S2. Kaplan-Meier survival curves for in-hospital mortality among patients with acute myocardial infarction without heart failure. BUN, blood urea nitrogen; Cr, creatinine; T, tertile.

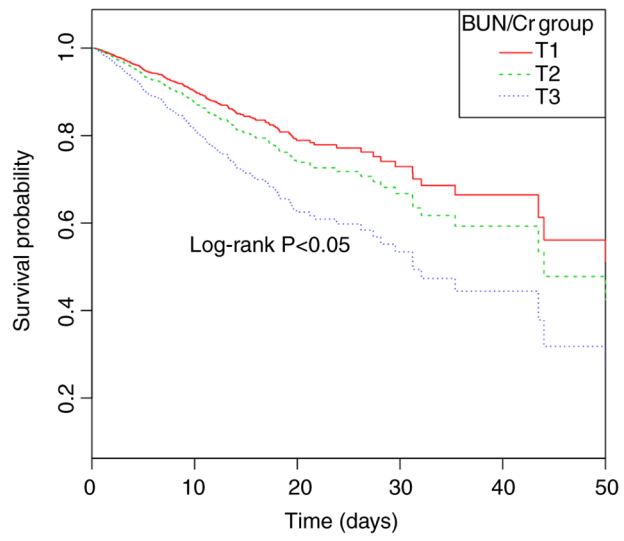

Figure S3. Receiver operating characteristic curves for different indicators to predict in-hospital mortality for patients with acute myocardial infarction. AUC, area under the curve; BUN, blood urea nitrogen; Cr, creatinine; cTnI, cardiac troponin I.

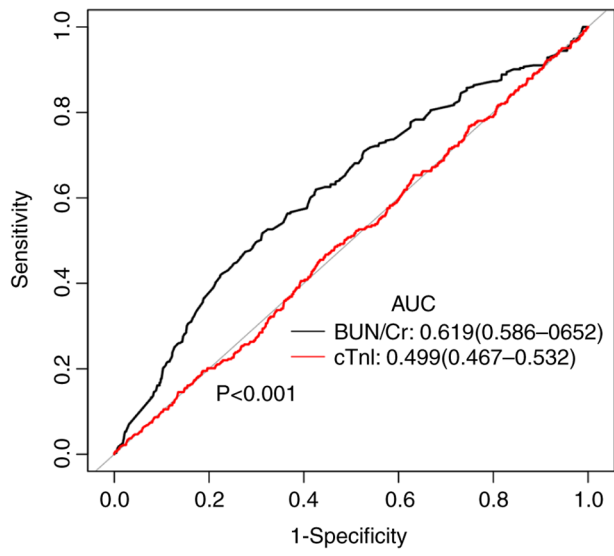

Supplement: Supplementary file 1 [file downloadSupplementary]
